# Supplementary material
Source: MDPI journal article supplement (https://www.mdpi.com/2075-163X/13/5/682)
Supplement: s1 [file s1]

## Supplementary Material

**Table S1:** Summary of all fluid sample measurements. The estimated uncertainties on the measurement of temperature is  $\pm 1$  °C, on the reported flow rate is  $\pm 0.02$  g min<sup>-1</sup>, on the pH is  $\pm 0.03$  pH unit, and on the Si concentrations is  $\pm 3$ -5%.

### Experimental Series Basaltic Glass G-10

| Experiment              | Experimenta | Elapsed | Reactor Temp. | Fluid flow | Outlet | Inlet |            |
|-------------------------|-------------|---------|---------------|------------|--------|-------|------------|
| ID                      | l sample    | time    | (T °C)        | rate       | pH     | pH    | [Si] (ppm) |
|                         |             | (hours) |               | (g/min)    |        |       |            |
| G-NaCl-10               | A0          | 0       | 25.0          | 1.30       |        |       | 0          |
|                         | A1          | 74      | 25.2          | 0.84       | 3.71   | 3.59  | 0.27       |
|                         | A2          | 100     | 25.3          | 0.80       | 3.57   | 3.59  | 0.23       |
|                         | A3          | 141     | 25.3          | 0.90       | 3.80   | 3.59  | 0.23       |
|                         | A4          | 163     | 25.3          | 0.85       | 3.64   | 3.59  | 0.24       |
|                         | A5          | 173     | 25.1          | 0.89       | 3.58   | 3.59  | 0.23       |
|                         | A6          | 187     | 25.1          | 0.80       | 3.65   | 3.59  | 0.24       |
|                         | A7          | 197     | 25.2          | 0.86       | 3.63   | 3.59  | 0.27       |
| G-KCl-10                | A8          | 210     | 25.2          | 0.87       | 3.74   | 3.59  | 0.24       |
|                         | A9          | 307     | 25.0          | 0.93       | 3.59   | 3.57  | 0.18       |
|                         | A10         | 317     | 25.0          | 0.88       | 3.66   | 3.57  | 0.16       |
|                         | A11         | 331     | 25.0          | 0.87       | 3.61   | 3.57  | 0.18       |
|                         | A12         | 341     | 25.0          | 0.86       | 3.59   | 3.57  | 0.19       |
|                         | A13         | 355     | 25.0          | 0.86       | 3.60   | 3.57  | 0.18       |
|                         | A14         | 365     | 25.0          | 0.86       | 3.58   | 3.57  | 0.18       |
|                         | A15         | 379     | 25.0          | 0.85       | 3.60   | 3.57  | 0.22       |
| G-CaCl <sub>2</sub> -10 | A16         | 386     | 25.0          | 0.86       | 3.58   | 3.57  | 0.22       |
|                         | A17         | 477     | 25.0          | 0.86       | 3.59   | 3.55  | 0.42       |
|                         | A18         | 486     | 25.0          | 0.86       | 3.67   | 3.55  | 0.44       |
|                         | A19         | 499     | 25.0          | 0.85       | 3.62   | 3.55  | 0.45       |
|                         | A20         | 509     | 25.0          | 0.86       | 3.64   | 3.55  | 0.44       |
|                         | A21         | 523     | 25.0          | 0.85       | 3.66   | 3.55  | 0.45       |
|                         | A22         | 532     | 25.0          | 0.86       | 3.63   | 3.55  | 0.46       |
|                         | A23         | 547     | 25.0          | 0.86       | 3.59   | 3.55  | 0.51       |
|                         | A24         | 557     | 25.0          | 0.86       | 3.55   | 3.55  | 0.49       |
|                         | A25         | 571     | 25.0          | 0.85       | 3.58   | 3.55  | 0.48       |
|                         | A26         | 579     | 25.0          | 0.86       | 3.56   | 3.55  | 0.49       |
| G-MgCl <sub>2</sub> -10 | A27         | 666     | 25.0          | 0.82       | 3.64   | 3.56  | 0.49       |
|                         | A28         | 692     | 25.0          | 0.83       | 3.97   | 3.56  | 0.49       |
|                         | A29         | 700     | 25.0          | 0.84       | 3.60   | 3.56  | 0.49       |
|                         | A30         | 714     | 25.0          | 0.84       | 3.51   | 3.56  | 0.50       |
|                         | A31         | 724     | 25.0          | 0.84       | 3.55   | 3.56  | 0.49       |
|                         | A32         | 739     | 25.0          | 0.84       | 3.45   | 3.56  | 0.48       |
|                         | A33         | 747     | 25.0          | 0.82       | 3.57   | 3.56  | 0.58       |
|                         | A34         | 764     | 25.0          | 0.84       | 3.72   | 3.56  | 0.55       |
|                         | A35         | 773     | 25.0          | 0.84       | 3.75   | 3.56  | 0.55       |
|                         | A36         | 788     | 25.0          | 0.84       | 3.69   | 3.56  | 0.53       |

## Experimental Series Basaltic Glass G-100

| Experiment               |             | Elapsed | Fluid flow    |         |        |       |            |
|--------------------------|-------------|---------|---------------|---------|--------|-------|------------|
| ID                       | Experimenta | time    | Reactor Temp. | rate    | Outlet | Inlet |            |
|                          | l sample    | (hours) | (T °C)        | (g/min) | pH     | pH    | [Si] (ppm) |
| G-NaCl-100               | B0          | 0       |               | 1.30    |        |       | 0          |
|                          | B1          | 74      | 23.3          | 1.07    | 3.85   | 3.68  | 0.27       |
|                          | B2          | 100     | 22.7          | 1.09    | 3.75   | 3.68  | 0.24       |
|                          | B3          | 141     | 23            | 1.04    | 3.82   | 3.68  | 0.25       |
|                          | B4          | 163     | 23.6          | 0.99    | 3.78   | 3.68  | 0.26       |
|                          | B5          | 173     | 22.9          | 0.99    | 3.80   | 3.68  | 0.25       |
|                          | B6          | 187     | 23.2          | 1.01    | 3.83   | 3.68  | 0.28       |
|                          | B7          | 197     | 22            | 1.02    | 3.78   | 3.68  | 0.29       |
|                          | B8          | 210     | 24.1          | 1.08    | 3.79   | 3.68  | 0.25       |
| G-KCl-100                | B9          | 307     | 22.9          | 0.97    | 3.66   | 3.65  | 0.14       |
|                          | B10         | 317     | 22            | 0.94    | 3.61   | 3.65  | 0.19       |
|                          | B11         | 331     | 23.1          | 0.93    | 3.64   | 3.65  | 0.17       |
|                          | B12         | 341     | 22.5          | 0.93    | 3.67   | 3.65  | 0.19       |
|                          | B13         | 355     | 23.1          | 0.92    | 3.66   | 3.65  | 0.17       |
|                          | B14         | 365     | 22.4          | 0.92    | 3.67   | 3.65  | 0.20       |
|                          | B15         | 379     | 23            | 0.92    | 3.68   | 3.65  | 0.18       |
|                          | B16         | 386     | 23.3          | 0.92    | 3.69   | 3.65  | 0.60       |
| G-CaCl <sub>2</sub> -100 | B17         | 477     | 22.4          | 0.91    | 3.66   | 3.53  | 0.41       |
|                          | B18         | 486     | 21.7          | 0.91    | 3.68   | 3.53  | 0.41       |
|                          | B19         | 499     | 22.4          | 0.90    | 3.67   | 3.53  | 0.40       |
|                          | B20         | 509     | 21.2          | 0.90    | 3.66   | 3.53  | 0.41       |
|                          | B21         | 523     | 22.3          | 0.89    | 3.68   | 3.53  | 0.40       |
|                          | B22         | 532     | 21.7          | 0.90    | 3.65   | 3.53  | 0.41       |
|                          | B23         | 547     | 22.4          | 0.90    | 3.64   | 3.53  | 0.46       |
|                          | B24         | 557     | 21.5          | 0.90    | 3.65   | 3.53  | 0.48       |
|                          | B25         | 571     | 22.4          | 0.90    | 3.64   | 3.53  | 0.47       |
|                          | B26         | 579     | 23.1          | 0.91    | 3.63   | 3.53  | 0.46       |
| G-MgCl <sub>2</sub> -100 | B27         | 666     | 22.4          | 0.90    | 3.66   | 3.59  | 0.38       |
|                          | B28         | 692     | 22.2          | 0.91    | 3.82   | 3.59  | 0.35       |
|                          | B29         | 700     | 21.1          | 0.91    | 3.64   | 3.59  | 0.35       |
|                          | B30         | 714     | 22.2          | 0.89    | 3.55   | 3.59  | 0.35       |
|                          | B31         | 724     | 21.9          | 0.91    | 3.54   | 3.59  | 0.35       |
|                          | B32         | 739     | 21.8          | 0.92    | 3.54   | 3.59  | 0.35       |
|                          | B33         | 747     | 22.8          | 0.90    | 3.60   | 3.59  | 0.40       |
|                          | B34         | 764     | 22            | 0.92    | 3.62   | 3.59  | 0.38       |
|                          | B35         | 773     | 21.7          | 0.92    | 3.65   | 3.59  | 0.38       |
|                          | B36         | 788     | 22.4          | 0.92    | 3.74   | 3.59  | 0.99       |

## Experimental Series Basaltic Glass G-700

| Experiment ID            | Experimenta<br>l sample | Elapsed<br>time<br>(hours) | Reactor Temp.<br>(T °C) | Fluid flow<br>rate<br>(g/min) | Outlet<br>pH | Inlet<br>pH | [Si] (ppm) |
|--------------------------|-------------------------|----------------------------|-------------------------|-------------------------------|--------------|-------------|------------|
| G-NaCl-700               | C0                      | 0                          | 25.00                   | 1.30                          |              |             | 0          |
|                          | C1                      | 74                         | 25.2                    | 1.16                          | 3.96         | 3.57        | 0.14       |
|                          | C2                      | 100                        | 25.3                    | 1.15                          | 3.71         | 3.57        | 0.16       |
|                          | C3                      | 141                        | 25.3                    | 1.09                          | 3.66         | 3.57        | 0.17       |
|                          | C4                      | 163                        | 25.3                    | 1.07                          | 3.61         | 3.57        | 0.16       |
|                          | C5                      | 173                        | 25.1                    | 1.08                          | 3.60         | 3.57        | 0.17       |
|                          | C6                      | 187                        | 25.1                    | 1.00                          | 3.62         | 3.57        | 0.17       |
|                          | C7                      | 197                        | 25.2                    | 1.05                          | 3.57         | 3.57        | 0.13       |
|                          | C8                      | 210                        | 25.2                    | 1.05                          | 3.97         | 3.57        | 1.29       |
| G-KCl-700                | C9                      | 307                        | 25.0                    | 0.99                          | 3.59         | 3.64        | 0.15       |
|                          | C10                     | 317                        | 25.0                    | 0.87                          | 3.58         | 3.64        | 0.15       |
|                          | C11                     | 331                        | 25.0                    | 0.88                          | 3.57         | 3.64        | 0.15       |
|                          | C12                     | 341                        | 25.0                    | 0.88                          | 3.58         | 3.64        | 0.18       |
|                          | C13                     | 355                        | 25.0                    | 0.91                          | 3.57         | 3.64        | 0.14       |
|                          | C14                     | 365                        | 25.0                    | 0.92                          | 3.57         | 3.64        | 0.15       |
|                          | C15                     | 379                        | 25.0                    | 0.90                          | 3.60         | 3.64        | 0.23       |
|                          | C16                     | 386                        | 25.0                    | 0.91                          | 3.57         | 3.64        | 0.18       |
| G-CaCl <sub>2</sub> -700 | C17                     | 477                        | 25.0                    | 0.87                          | 3.76         | 3.56        | 0.48       |
|                          | C18                     | 486                        | 25.0                    | 0.97                          | 3.76         | 3.56        | 0.35       |
|                          | C19                     | 499                        | 25.0                    | 0.97                          | 3.73         | 3.56        | 0.33       |
|                          | C20                     | 509                        | 25.0                    | 0.97                          | 3.79         | 3.56        | 0.34       |
|                          | C21                     | 523                        | 25.0                    | 0.97                          | 3.74         | 3.56        | 0.36       |
|                          | C22                     | 532                        | 25.0                    | 0.97                          | 3.71         | 3.56        | 0.35       |
|                          | C23                     | 547                        | 25.0                    | 0.96                          | 3.70         | 3.56        | 0.42       |
|                          | C24                     | 557                        | 25.0                    | 0.96                          | 3.70         | 3.56        | 0.43       |
|                          | C25                     | 571                        | 25.0                    | 0.96                          | 3.75         | 3.56        | 0.40       |
|                          | C26                     | 579                        | 25.0                    | 0.96                          | 3.79         | 3.56        | 0.92       |
| G-MgCl <sub>2</sub> -700 | C27                     | 666                        | 25.0                    | 0.95                          | 4.50         | 3.63        | 0.22       |
|                          | C28                     | 692                        | 25.0                    | 0.95                          | 3.48         | 3.63        | 0.44       |
|                          | C29                     | 700                        | 25.0                    | 0.95                          | 3.30         | 3.63        | 0.44       |
|                          | C30                     | 714                        | 25.0                    | 0.84                          | 3.45         | 3.63        | 0.22       |
|                          | C31                     | 724                        | 25.0                    | 0.95                          | 3.50         | 3.63        | 0.24       |
|                          | C32                     | 739                        | 25.0                    | 0.95                          | 3.62         | 3.63        | 0.18       |
|                          | C33                     | 747                        | 25.0                    | 0.93                          | 3.93         | 3.63        | 0.23       |
|                          | C34                     | 764                        | 25.0                    | 0.87                          | 3.64         | 3.65        | 0.22       |
|                          | C35                     | 773                        | 25.0                    | 0.96                          | 3.58         | 3.65        | 0.19       |
|                          | C36                     | 788                        | 25.0                    | 0.96                          | 3.61         | 3.65        | 0.14       |
|                          | C37                     | 810                        | 25.0                    | 0.95                          | 3.68         | 3.65        | 0.18       |
|                          | C38                     | 832                        | 25.0                    | 0.97                          | 3.55         | 3.65        | 0.21       |
|                          | C39                     | 854                        | 25.0                    | 0.97                          | 3.74         | 3.65        | 0.35       |

## Experimental Series Labradorite L-10

| Experiment ID           | Experimenta l sample | Elapsed time (hours) | Reactor Temp. (T °C) | Fluid flow rate (g/min) | Outlet pH | Inlet pH | [Si] (ppm) |
|-------------------------|----------------------|----------------------|----------------------|-------------------------|-----------|----------|------------|
| L-NaCl-10               | A39                  | 0                    | 25.0                 | 1.30                    |           |          | 0          |
|                         | A40                  | 66                   | 25.0                 | 0.76                    | 3.77      | 3.68     | 0.68       |
|                         | A41                  | 74                   | 25.0                 | 0.76                    | 3.78      | 3.68     | 0.66       |
|                         | A42                  | 88                   | 25.0                 | 0.76                    | 3.78      | 3.68     | 0.68       |
|                         | A43                  | 97                   | 25.0                 | 0.85                    | 3.78      | 3.68     | 0.57       |
|                         | A44                  | 112                  | 25.0                 | 0.85                    | 3.75      | 3.68     | 0.58       |
|                         | A45                  | 121                  | 25.0                 | 0.85                    | 3.77      | 3.68     | 0.57       |
|                         | A46                  | 137                  | 25.0                 | 0.85                    | 3.78      | 3.68     | 0.53       |
|                         | A47                  | 146                  | 25.0                 | 0.85                    | 3.76      | 3.68     | 0.52       |
|                         | A48                  | 162                  | 25.0                 | 0.82                    | 3.78      | 3.68     | 0.50       |
|                         | A49                  | 185                  | 25.0                 | 0.85                    | 3.76      | 3.68     | 0.51       |
|                         | A50                  | 194                  | 25.0                 | 0.84                    | 3.75      | 3.68     | 0.50       |
|                         | A51                  | 208                  | 25.0                 | 0.85                    | 3.75      | 3.68     | 0.50       |
|                         |                      |                      |                      |                         |           |          |            |
| L-KCl-10                | A52                  | 287                  | 25.0                 | 0.91                    | 3.73      | 3.62     | 0.58       |
|                         | A53                  | 304                  | 25.0                 | 0.84                    | 3.73      | 3.62     | 0.55       |
|                         | A54                  | 313                  | 25.0                 | 0.84                    | 3.72      | 3.62     | 0.51       |
|                         | A55                  | 329                  | 25.0                 | 0.83                    | 3.72      | 3.62     | 0.47       |
|                         | A56                  | 339                  | 25.0                 | 0.83                    | 3.73      | 3.62     | 0.45       |
|                         | A57                  | 353                  | 25.0                 | 0.83                    | 3.74      | 3.62     | 0.44       |
|                         | A58                  | 376                  | 25.0                 | 0.83                    | 3.72      | 3.62     | 0.39       |
|                         | A59                  | 385                  | 25.0                 | 0.82                    | 3.69      | 3.62     | 0.37       |
|                         | A60                  | 400                  | 25.0                 | 0.83                    | 3.68      | 3.62     | 0.37       |
|                         | A61                  | 410                  | 25.0                 | 0.83                    | 3.69      | 3.62     | 0.37       |
|                         | A62                  | 431                  | 25.0                 | 0.83                    | 3.72      | 3.62     | 0.30       |
|                         |                      |                      |                      |                         |           |          |            |
| L-CaCl <sub>2</sub> -10 | A63                  | 497                  | 25.0                 | 0.86                    | 3.66      | 3.64     | 0.19       |
|                         | A64                  | 506                  | 25.0                 | 0.86                    | 3.65      | 3.64     | 0.18       |
|                         | A65                  | 526                  | 25.0                 | 0.85                    | 3.66      | 3.64     | 0.17       |
|                         | A66                  | 544                  | 25.0                 | 0.85                    | 3.64      | 3.64     | 0.18       |
|                         | A67                  | 553                  | 25.0                 | 0.86                    | 3.66      | 3.64     | 0.17       |
|                         | A68                  | 568                  | 25.0                 | 0.84                    | 3.65      | 3.64     | 0.17       |
|                         | A69                  | 578                  | 25.0                 | 0.85                    | 3.65      | 3.64     | 0.17       |
|                         | A70                  | 592                  | 25.0                 | 0.85                    | 3.66      | 3.64     | 0.19       |
|                         | A71                  | 602                  | 25.0                 | 0.85                    | 3.65      | 3.64     | 0.19       |
|                         | A72                  | 616                  | 25.0                 | 0.85                    | 3.65      | 3.64     | 0.18       |
|                         | A73                  | 626                  | 25.0                 | 0.85                    | 3.66      | 3.64     | 0.18       |
|                         | A74                  | 637                  | 25.0                 | 0.85                    | 3.64      | 3.64     | 0.17       |
|                         | A75                  | 650                  | 25.0                 | 0.85                    | 3.64      | 3.64     | 0.17       |
|                         | A76                  | 667                  | 25.0                 | 0.85                    | 3.66      | 3.64     | 0.27       |

|                         |     |     |      |      |      |      |      |
|-------------------------|-----|-----|------|------|------|------|------|
| L-MgCl <sub>2</sub> -10 | A77 | 736 | 25.0 | 0.87 | 3.65 | 3.64 | 0.23 |
|                         | A78 | 745 | 25.0 | 0.86 | 3.65 | 3.64 | 0.21 |
|                         | A79 | 760 | 25.0 | 0.85 | 3.65 | 3.64 | 0.19 |
|                         | A80 | 770 | 25.0 | 0.86 | 3.66 | 3.64 | 0.21 |
|                         | A81 | 784 | 25.0 | 0.87 | 3.65 | 3.64 | 0.20 |
|                         | A82 | 794 | 25.0 | 0.87 | 3.65 | 3.64 | 0.17 |
|                         | A83 | 808 | 25.0 | 0.87 | 3.65 | 3.64 | 0.19 |
|                         | A84 | 818 | 25.0 | 0.87 | 3.66 | 3.64 | 0.17 |
|                         | A85 | 838 | 25.0 | 0.86 | 3.65 | 3.64 | 0.16 |
|                         | A86 | 857 | 25.0 | 0.86 | 3.64 | 3.64 | 0.16 |
|                         | A87 | 865 | 25.0 | 0.87 | 3.65 | 3.64 | 0.15 |
|                         | A88 | 880 | 25.0 | 0.86 | 3.66 | 3.64 | 0.14 |
|                         | A89 | 890 | 25.0 | 0.86 | 3.66 | 3.64 | 0.15 |

#### Experimental Series Labradorite L-50

| Experiment              |                         | Elapsed         | Reactor Temp.<br>(T °C) | Fluid flow      |              |             |            |
|-------------------------|-------------------------|-----------------|-------------------------|-----------------|--------------|-------------|------------|
| ID                      | Experimenta<br>l sample | time<br>(hours) |                         | rate<br>(g/min) | Outlet<br>pH | Inlet<br>pH | [Si] (ppm) |
| L-NaCl-50               | B39                     | 0               | 25.0                    | 1.20            |              |             | 0          |
|                         | B40                     | 66              | 25.0                    | 0.87            | 3.73         | 3.63        | 0.46       |
|                         | B41                     | 74              | 25.0                    | 0.86            | 3.75         | 3.63        | 0.44       |
|                         | B42                     | 88              | 25.0                    | 0.87            | 3.76         | 3.63        | 0.48       |
|                         | B43                     | 97              | 25.0                    | 0.87            | 3.75         | 3.63        | 0.48       |
|                         | B44                     | 112             | 25.0                    | 0.86            | 3.75         | 3.63        | 0.45       |
|                         | B45                     | 121             | 25.0                    | 0.86            | 3.75         | 3.63        | 0.44       |
|                         | B46                     | 137             | 25.0                    | 0.86            | 3.74         | 3.63        | 0.43       |
|                         | B47                     | 146             | 25.0                    | 0.86            | 3.72         | 3.63        | 0.42       |
|                         | B48                     | 162             | 25.0                    | 0.86            | 3.73         | 3.63        | 0.41       |
|                         | B49                     | 185             | 25.0                    | 0.85            | 3.73         | 3.63        | 0.43       |
|                         | B50                     | 194             | 25.0                    | 0.86            | 3.70         | 3.63        | 0.41       |
| L-KCl-50                | B51                     | 208             | 25.0                    | 0.85            | 3.72         | 3.63        | 0.39       |
|                         | B52                     | 287             | 25.0                    | 0.88            | 3.78         | 3.66        | 0.64       |
|                         | B53                     | 304             | 25.0                    | 0.88            | 3.77         | 3.66        | 0.61       |
|                         | B54                     | 313             | 25.0                    | 0.88            | 3.77         | 3.66        | 0.58       |
|                         | B55                     | 329             | 25.0                    | 0.87            | 3.75         | 3.66        | 0.54       |
|                         | B56                     | 339             | 25.0                    | 0.87            | 3.78         | 3.66        | 0.52       |
|                         | B57                     | 353             | 25.0                    | 0.87            | 3.77         | 3.66        | 0.50       |
|                         | B58                     | 376             | 25.0                    | 0.87            | 3.73         | 3.66        | 0.48       |
|                         | B59                     | 385             | 25.0                    | 0.88            | 3.74         | 3.66        | 0.48       |
|                         | B60                     | 400             | 25.0                    | 0.87            | 3.73         | 3.66        | 0.45       |
|                         | B61                     | 410             | 25.0                    | 0.86            | 3.74         | 3.66        | 0.46       |
|                         | B62                     | 431             | 25.0                    | 0.87            | 3.71         | 3.66        | 0.39       |
| L-CaCl <sub>2</sub> -50 | B63                     | 497             | 25.0                    | 0.83            | 3.69         | 3.66        | 0.31       |
|                         | B64                     | 506             | 25.0                    | 0.83            | 3.70         | 3.66        | 0.27       |
|                         | B65                     | 526             | 25.0                    | 0.83            | 3.67         | 3.66        | 0.29       |
|                         | B66                     | 544             | 25.0                    | 0.83            | 3.69         | 3.66        | 0.28       |
|                         | B67                     | 553             | 25.0                    | 0.83            | 3.71         | 3.66        | 0.29       |
|                         | B68                     | 568             | 25.0                    | 0.82            | 3.71         | 3.66        | 0.29       |

|                         |     |     |      |      |      |      |      |
|-------------------------|-----|-----|------|------|------|------|------|
| L-MgCl <sub>2</sub> -50 | B69 | 578 | 25.0 | 0.83 | 3.71 | 3.66 | 0.29 |
|                         | B70 | 592 | 25.0 | 0.83 | 3.72 | 3.66 | 0.29 |
|                         | B71 | 602 | 25.0 | 0.83 | 3.71 | 3.66 | 0.29 |
|                         | B72 | 616 | 25.0 | 0.83 | 3.72 | 3.66 | 0.30 |
|                         | B73 | 626 | 25.0 | 0.83 | 3.71 | 3.66 | 0.31 |
|                         | B74 | 637 | 25.0 | 0.83 | 3.72 | 3.66 | 0.29 |
|                         | B75 | 650 | 25.0 | 0.84 | 3.70 | 3.66 | 0.29 |
|                         | B76 | 667 | 25.0 | 0.84 | 3.70 | 3.66 | 0.35 |
|                         | B77 | 736 | 25.0 | 0.86 | 3.71 | 3.68 | 0.27 |
|                         | B78 | 745 | 25.0 | 0.87 | 3.71 | 3.68 | 0.27 |
|                         | B79 | 760 | 25.0 | 0.86 | 3.72 | 3.68 | 0.25 |
|                         | B80 | 770 | 25.0 | 0.86 | 3.70 | 3.68 | 0.23 |
|                         | B81 | 784 | 25.0 | 0.86 | 3.71 | 3.68 | 0.26 |
|                         | B82 | 794 | 25.0 | 0.87 | 3.71 | 3.68 | 0.23 |
|                         | B83 | 808 | 25.0 | 0.86 | 3.72 | 3.68 | 0.24 |
|                         | B84 | 818 | 25.0 | 0.87 | 3.72 | 3.68 | 0.27 |
|                         | B85 | 838 | 25.0 | 0.86 | 3.72 | 3.68 | 0.23 |
|                         | B86 | 857 | 25.0 | 0.86 | 3.69 | 3.68 | 0.25 |
|                         | B87 | 865 | 25.0 | 0.86 | 3.69 | 3.68 | 0.21 |
|                         | B88 | 880 | 25.0 | 0.86 | 3.72 | 3.68 | 0.22 |
|                         | B89 | 890 | 25.0 | 0.86 | 3.71 | 3.68 | 0.23 |

#### Experimental Series Labradorite L-200

| Experiment ID            | Experimenta<br>l sample | Elapsed<br>time<br>(hours) | Reactor Temp.<br>(T °C) | Fluid flow<br>rate<br>(g/min) | Outlet<br>pH | Inlet<br>pH | [Si] (ppm) |
|--------------------------|-------------------------|----------------------------|-------------------------|-------------------------------|--------------|-------------|------------|
| L-NaCl-200               | C39                     | 0                          | 25.0                    | 1.20                          |              |             |            |
|                          | C40                     | 66                         | 25.0                    | 1.03                          | 3.76         | 3.64        | 0.53       |
|                          | C41                     | 74                         | 25.0                    | 1.03                          | 3.75         | 3.64        | 0.51       |
|                          | C42                     | 88                         | 25.0                    | 1.03                          | 3.80         | 3.64        | 0.55       |
|                          | C43                     | 97                         | 25.0                    | 0.80                          | 3.76         | 3.64        | 0.53       |
|                          | C44                     | 112                        | 25.0                    | 0.84                          | 3.73         | 3.64        | 0.64       |
|                          | C45                     | 121                        | 25.0                    | 0.84                          | 3.78         | 3.64        | 0.62       |
|                          | C46                     | 137                        | 25.0                    | 0.84                          | 3.79         | 3.64        | 0.58       |
|                          | C47                     | 146                        | 25.0                    | 0.84                          | 3.75         | 3.64        | 0.57       |
|                          | C48                     | 162                        | 25.0                    | 0.84                          | 3.75         | 3.64        | 0.48       |
|                          | C49                     | 185                        | 25.0                    | 0.84                          | 3.73         | 3.64        | 0.44       |
| L-KCl-200                | C50                     | 194                        | 25.0                    | 0.84                          | 3.70         | 3.64        | 0.43       |
|                          | C51                     | 208                        | 25.0                    | 0.82                          | 3.73         | 3.64        | 0.50       |
|                          | C52                     | 287                        | 25.0                    | 0.88                          | 3.80         | 3.66        | 0.64       |
|                          | C53                     | 304                        | 25.0                    | 0.87                          | 3.79         | 3.66        | 0.55       |
|                          | C54                     | 313                        | 25.0                    | 0.87                          | 3.76         | 3.66        | 0.52       |
|                          | C55                     | 329                        | 25.0                    | 0.87                          | 3.76         | 3.66        | 0.45       |
|                          | C56                     | 339                        | 25.0                    | 0.87                          | 3.77         | 3.66        | 0.43       |
|                          | C57                     | 353                        | 25.0                    | 0.87                          | 3.77         | 3.66        | 0.37       |
|                          | C58                     | 376                        | 25.0                    | 0.86                          | 3.76         | 3.66        | 0.36       |
|                          | C59                     | 385                        | 25.0                    | 0.87                          | 3.73         | 3.66        | 0.34       |
|                          | C60                     | 400                        | 25.0                    | 0.86                          | 3.72         | 3.66        | 0.31       |
|                          | C61                     | 410                        | 25.0                    | 0.86                          | 3.74         | 3.66        | 0.36       |
|                          | C62                     | 431                        | 25.0                    | 0.87                          | 3.72         | 3.66        | 0.30       |
|                          | C63                     | 497                        | 25.0                    | 0.86                          | 3.65         | 3.61        | 0.22       |
| L-CaCl <sub>2</sub> -200 | C64                     | 506                        | 25.0                    | 0.86                          | 3.65         | 3.61        | 0.21       |
|                          | C65                     | 526                        | 25.0                    | 0.86                          | 3.63         | 3.61        | 0.18       |

---

|                          |     |     |      |      |      |      |      |
|--------------------------|-----|-----|------|------|------|------|------|
|                          | C66 | 544 | 25.0 | 0.86 | 3.64 | 3.61 | 0.17 |
|                          | C67 | 553 | 25.0 | 0.86 | 3.65 | 3.61 | 0.17 |
|                          | C68 | 568 | 25.0 | 0.86 | 3.65 | 3.61 | 0.18 |
|                          | C69 | 578 | 25.0 | 0.86 | 3.65 | 3.61 | 0.17 |
|                          | C70 | 592 | 25.0 | 0.86 | 3.65 | 3.61 | 0.19 |
|                          | C71 | 602 | 25.0 | 0.86 | 3.65 | 3.61 | 0.17 |
|                          | C72 | 616 | 25.0 | 0.86 | 3.65 | 3.61 | 0.18 |
|                          | C73 | 626 | 25.0 | 0.86 | 3.65 | 3.61 | 0.19 |
|                          | C74 | 637 | 25.0 | 0.86 | 3.65 | 3.61 | 0.17 |
|                          | C75 | 650 | 25.0 | 0.85 | 3.64 | 3.61 | 0.18 |
|                          | C76 | 667 | 25.0 | 0.85 | 3.69 | 3.61 | 0.34 |
| L-MgCl <sub>2</sub> -200 | C77 | 736 | 25.0 | 0.86 | 3.69 | 3.65 | 0.24 |
|                          | C78 | 745 | 25.0 | 0.86 | 3.68 | 3.65 | 0.25 |
|                          | C79 | 760 | 25.0 | 0.85 | 3.69 | 3.65 | 0.23 |
|                          | C80 | 770 | 25.0 | 0.86 | 3.68 | 3.65 | 0.27 |
|                          | C81 | 784 | 25.0 | 0.86 | 3.69 | 3.65 | 0.28 |
|                          | C82 | 794 | 25.0 | 0.86 | 3.69 | 3.65 | 0.26 |
|                          | C83 | 808 | 25.0 | 0.86 | 3.69 | 3.65 | 0.27 |
|                          | C84 | 818 | 25.0 | 0.86 | 3.70 | 3.65 | 0.26 |
|                          | C85 | 838 | 25.0 | 0.86 | 3.70 | 3.65 | 0.26 |
|                          | C86 | 857 | 25.0 | 0.85 | 3.67 | 3.65 | 0.24 |
|                          | C87 | 865 | 25.0 | 0.86 | 3.68 | 3.65 | 0.23 |
|                          | C88 | 880 | 25.0 | 0.85 | 3.69 | 3.65 | 0.23 |
|                          | C89 | 890 | 25.0 | 0.86 | 3.69 | 3.65 | 0.24 |

---
